# Supplementary material for: Gated nanoprobe utilizing metal–organic frameworks for identifying and distinguishing between the wild strains and the vaccine strains of brucella
Source: Royal Society of Chemistry journal article supplement (doi:10.1039/d4an00014e), 2024-01-01
Supplement: d4an00014e1.pdf [file d4an00014e1.pdf]

1  
2  
3  
4  
5  
6  
7  
8  
9  
10  
11  
12  
13  
14  
15  
16  
17  
18

## Supplementary Material

### **Gated Nanoprobe Utilizing Metal–Organic Frameworks for Identifying and Distinguishing Between the Wild Strains and the Vaccine Strains of Brucella**

Dong Li<sup>a</sup>, Shuna Ren<sup>a</sup>, Xiaotong Wang<sup>a</sup>, Lili Chen<sup>a</sup>, Shuang You<sup>a</sup>,  
Yan Tang<sup>b\*</sup>, Lihua Chen<sup>a\*</sup>

<sup>a</sup> Key Laboratory of Optic-electric Sensing and Analytical Chemistry for Life Science; Shandong Key Laboratory of Biochemical Analysis; Key Laboratory of Analytical Chemistry for Life Science in Universities of Shandong; Key Laboratory of Eco-chemical Engineering; College of Chemistry and Molecular Engineering, Qingdao University of Science and Technology, Qingdao 266042, PR China.

<sup>b</sup> Xinjiang Agricultural vocational Technical College; Institute of Western Agriculture, the Chinese Academy of Agricultural sciences.

\*Corresponding author: Lihua Chen, E-mail: Lihuachen@qust.edu.cn, Fax: +86 53284022681; Tel: +86 15054246089. Yan Tang, E-mail: 1074086262@qq.com, Fax: +86 53284022681; Tel: +86 19915016436.

Supporting information: S1~S3, Tables S1~S4, and Figures S1~S19.

## 19 S1 Preparation of NH<sub>2</sub>-MIL-53 (Al)

20 NH<sub>2</sub>-MIL-53 (Al) was synthesized by the solvothermal method <sup>1</sup>. First, AlCl<sub>3</sub>  
21 ·H<sub>2</sub>O (1.52 g), NH<sub>2</sub>-BDC (1.12 g), deionized water (15 mL), and DMF (45 mL) were  
22 added into a 100 mL stainless steel reaction kettle with a Teflon lining together, then  
23 placed in a laboratory oven at 150 °C for 24 hours. Next, after vacuum filtration, a light  
24 milky yellow product was obtained, subsequently dissolved in DMF, and refluxed at  
25 150 °C for 8 hours. Finally, after washing with acetone and drying by vacuum, a  
26 purified NH<sub>2</sub>-MIL-53(Al) was successfully prepared, then placed in a refrigerator at 4  
27 °C for further use. If it is for long-term storage, the product will be placed in a vial filled  
28 with nitrogen and then placed in a dryer after the activation step. The purification step:  
29 the product was purified in boiling DMF for 5 hours to remove the remaining water  
30 molecules or unreacted ligands trapped in the pores. The activation step: the product  
31 was washed with acetone and dried in a vacuum oven at 30 °C before further analysis.

## 32 S2 Gel electrophoresis assay

33 First, 40% acrylamide/bisacrylamide gel solution (3.5 mL), H<sub>2</sub>O (4.25 mL), 50 ×  
34 TAE buffer (160 μL), 10% ammonium persulfate (APS) (80 μL) and TEMED (4 μL)  
35 were mixed and added into the gel plate. After 30 minutes, the freshly prepared gel was  
36 soaked in 1× TAE buffer.

37 Then, 10 μL each of T1, T2, WB1, WB2, T1T2, and WB1WB2 (at a concentration  
38 of  $1 \times 10^{-5}$  M) were individually immersed into MOF@Flu@P1h and MOF@Rho  
39 6G@P2h (1 mL, 1:1) and incubated for 0.5 hours at 37 °C. Subsequently, 10 μL  
40 supernatant from each mixture was collected, then thoroughly mixed with 2 μL of  
41 buffer, one by one. Subsequently, these samples were added to each lane and the power  
42 supply was activated. Finally, the gel was removed and stained with ethidine bromide  
43 (EB) solution (30 μL, diluted with deionized water) in darkness for 30 minutes. The gel  
44 was then imaged using a bioelectrophoretic image analysis system.

45 **S3 The formula involved in manuscript**

46  $\Delta$ Fluorescence intensity in all manuscript refers to the measured fluorescence signal  
47 intensity of the sample after subtracting the non-specific fluorescence signals  
48 originating from the environment or background. (Figure 1~5 in Manuscript, S1,S2,  
49 S5, S7 in Supplementary Materials )

50 Normalized  $\Delta$ Fluorescence intensity in Supplementary Materials refers to the  
51 measured fluorescence signal intensity of the sample after subtracting the non-specific  
52 fluorescence signals originating from the environment or background. The maximum  
53 value was set to 1. (Figure S9, S11~ S15, S17~ S19 in Supplementary Materials)

54 **Supporting Figures**

55 **Table S1** Traditional Testing based on different substrates

| Substrates                               | Causes of defects           | Result           |
|------------------------------------------|-----------------------------|------------------|
| Antibodies and antigens <sup>2,3,4</sup> | Law of antibodies formation | Long periodicity |
|                                          | Individual differences      | False negative   |
| Genes <sup>5,6</sup>                     | Complex primer design       | False positive   |
|                                          | Potential genetic mutations | False negative   |

56 **law of antibodies:** In natural infections, IgG is frequently found in abundance, while  
 57 IgM is relatively rare. Typically, IgG concentration reaches a relatively high level after  
 58 one month and often persists for up to one year. Interestingly, in the immune body, IgM  
 59 is more abundant than IgG, emerging as the first antibody. Furthermore, after around  
 60 one week, IgM concentration becomes detectable in the bloodstream. However, its  
 61 presence is temporary, typically lasting only a few weeks or months.

62 **Individual differences:** As we known, the virb12 protein or NH antibody is absent in  
 63 the immune body. However, due to individual differences, the concentration of NH  
 64 antibody and virb12 protein in some natural infections also keep in a low level, which  
 65 will make a confused result for the subsequently detection.

66 **Complex primer design:** The specificity of the PCR method is highly dependent on  
 67 the design of the primers. However, achieving specificity can be challenging when  
 68 dealing with wild strains or vaccine strains that share similar nucleic acid sequences.  
 69 This raises the risk of cross-reactivity, where the PCR primers may interact with non-

70 target sequences, resulting in the amplification of non-specific PCR products and the  
71 potential for false-positive results. Additionally, wild strains and vaccine strains often  
72 undergo genetic mutations, which can impede successful amplification or lead to false-  
73 negative results if the PCR primers do not align with the specific regions of the target  
74 sequence where mutations occur. Hence, it is crucial to give meticulous attention to  
75 primer design in order to overcome these challenges.

76 **Potential genetic mutations:** These vaccines are produced by subjecting virulent  
77 strains to a series of passages through high temperatures, radiation, or chemical  
78 reagents, which result in a high genetic similarity between the two strains involved in  
79 this process. Similarly, wild viruses and vaccines may also display genetic mutations.

80 **Table S2** Sequences of the oligonucleotides used in this study

| Name     | Sequences (5'~3')                                                                                               |
|----------|-----------------------------------------------------------------------------------------------------------------|
| P1h      | <b>stem-loop structure</b> <b>P1</b> <b>stem-loop structure</b><br>CCCCCCTCGCCAAGCGACTGGCCGCCAAAAGACTGC GGGGGG  |
| P2h      | <b>stem-loop structure</b> <b>P2</b> <b>stem-loop structure</b><br>AAAAAAATGGGTGTCGGCCCTCAATAGCGTCCCCGCA TTTTTT |
| T1       | GCAGTCTTTTGGCGGCCAGTCGCTTGGCGA<br>Complementary to P1                                                           |
| T2       | TGCGGGACGCTATTGAGGGCCGACACCCAT<br>Complementary to P2                                                           |
| T1M      | GCAGCCTTTTGGCGACCAGTCGCCTGGCGA                                                                                  |
| T2M      | TGCGAGACGCTATTTAGGGCCGATACCCAT                                                                                  |
| WB1      | ACTAATTCACCAGCAAGAACTCCACCTTG                                                                                   |
| WB2      | CTGGGAGGGAGGACAAGGTGGAGTTCTTG                                                                                   |
| MO       | ACTAATTCACCAGCAAGAACTCCACCTTG                                                                                   |
| TB       | TCGGGGTTGACCCACAAGCGCCGACTGTCGGCGCTG                                                                            |
| Y3       | Complementary to P1 Complementary to P2<br>GCAGTCTTTTGGCGGCCAGTCGCTTGGCGA TGCGGGACGCTATTGA<br>T1 T2             |
| (T1T2)   | GGGCCGACACCCAT                                                                                                  |
| A19      | Complementary to P1 Noncomplementary to P2<br>GCAGTCTTTTGGCGGCCAGTCGCTTGGCGA CTGGGAGGGAGGACAA<br>T1             |
| (T1WB2)  | GGTGGAGTTCTTG                                                                                                   |
| ZHU 1    | Complementary to P1<br>GCAGTCTTTTGGCGGCCAGTCGCTTGGCGA TGCGAGACGCTATTTA<br>T1<br>GGGCCGATACCCAT                  |
| Others   | ACTAATTCACCAGCAAGAACTCCACCTTGCTGGGAGGGAGGACAA                                                                   |
| (WB1WB2) | GGTGGAGTTCTTG                                                                                                   |

81 \***T1T2(Y3)**: T1T2 refers to a lengthy sequence comprising of two shorter chain

82 sequences, namely T1T2.

83 **T1 and T2:** T1 and T2 represents two shorter chain sequences.

84 **T1WB2(A19):** T1WB2 denotes a long sequence consisting of T1 and WB2 as its  
85 constituent short chain sequences, namely T1WB2.

86 **WB1WB2:** WB1WB2 signifies a prolonged sequence made up of WB1 and WB2 as  
87 the respective short chain sequences, namely WB1WB2.

88 **WB1 and WB2:** WB1 and WB2 implies the presence of WB1 and WB2.

89 As shown in Table S2. The blue part is the stem-loop structure sequence of the  
90 probe and the black part is the complementary sequence of the target. The red parts are  
91 the mismatched bases.



92 **Table S3** Gibbs free energy of the P1h, P2h, P1ss, P2ss, P1ss with T1, the P2ss with  
 93 T2, the P1h with T1 and the P2h with T2.

|                                               |       |       |      |      | P1ss   | P2ss   | P1h    | P2h    |
|-----------------------------------------------|-------|-------|------|------|--------|--------|--------|--------|
| <b>Name</b>                                   | P1h   | P2h   | P1ss | P2ss | with   | with   | with   | with   |
|                                               |       |       |      |      | T1     | T2     | T1     | T2     |
| <b><math>\Delta G(\text{kcal/mol})</math></b> | -8.69 | -5.50 | 0.00 | 0.00 | -47.81 | -46.81 | -48.24 | -47.54 |

94 **The theoretical energetics:** After designing the DNA strands, equilibrium probability  
 95 maps and secondary structure prediction maps for P1ss with T1 (10  $\mu\text{M}$ ), P2ss with T2  
 96 (10  $\mu\text{M}$ ), P1h with T1 (10  $\mu\text{M}$ ), and P2h with T2 (10  $\mu\text{M}$ ) were generated using the  
 97 NUPACK software. The Gibbs free energies of P1h and P2h were calculated to be -  
 98 8.69 kcal/mol and -5.50 kcal/mol, respectively in Figure S3. These values indicate that  
 99 the hairpin structures have lower energy and a more stable configuration compared to  
 100 P1ss and P2ss, thus confirming their propensity to form hairpin structures. As depicted  
 101 in Figure S2, the Gibbs free energies of P1h with T1 and P2h with T2 were determined  
 102 to be -48.24 kcal/mol and -47.54 kcal/mol, respectively. This suggests that the probes  
 103 with hairpin structures are more effective in target recognition compared to probes with  
 104 a linear configuration (Table S3).

105 **Table S4** Comparison of Different Detection Methods of wild strains and vaccine  
 106 strains.

| Method                              | Pathogen<br>isolation <sup>7,8</sup> | ELISA <sup>9,10</sup>    | PCR <sup>11</sup>                             | This work                                |
|-------------------------------------|--------------------------------------|--------------------------|-----------------------------------------------|------------------------------------------|
| Detection Principle                 | Bacteriology<br>test                 | Immunological<br>testing | Molecular<br>biology<br>testing               | Genetic<br>testing                       |
| One-step detection                  | NO                                   | NO                       | NO                                            | YES                                      |
| Safety                              | Low                                  | High                     | High                                          | High                                     |
| Laboratory                          | More than<br>BSL-2                   | ---                      | ---                                           | ---                                      |
| Technical personnel<br>requirements | High                                 | Low                      | High                                          | Low                                      |
| Experimental period                 | 1~2 weeks                            | 5 days                   | 2~4 hours                                     | 0.5 hours                                |
| Instrument costs                    | Low                                  | High                     | High                                          | Low                                      |
| Experimental cost                   | Low                                  | Low                      | High                                          | Low                                      |
| Linear range                        | 0.1~10 <sup>3</sup> µg/ml            | 10-100<br>copies/mL      | 10 <sup>3</sup> ~10 <sup>6</sup><br>copies/mL | 10 <sup>-6</sup> ~ 10 <sup>-9</sup><br>M |

108 **Figure S1** the specific excitation and emission wavelengths for Flu (A) and Rho6G (B).

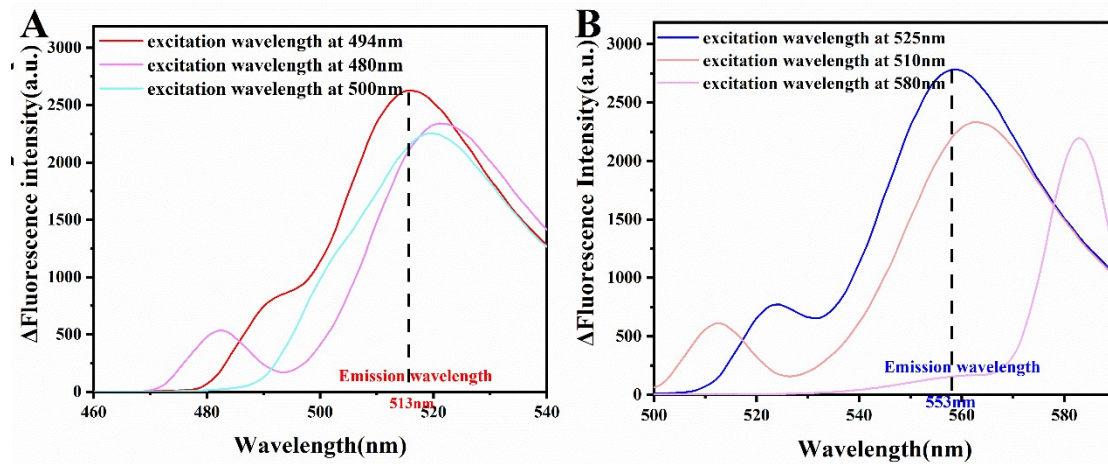

109

110 A series of excitation wavelength (480nm, 494nm, 500nm and 510nm, 525nm,  
111 580nm) was used to get emission wavelength. As shown in Figure S1, Flu is excited at  
112 494 nm (The excitation wavelength) and detected at 513 nm (the emission wavelength),  
113 while Rho 6G fluorescence is excited at 525 nm (The excitation wavelength) and  
114 detected at 553 nm (the emission wavelength).

115 **Figure S2** (A) Fluorescence response of Flu in buffer. (B) Fluorescence response of  
116 Rho 6G in buffer. Fluorescence response of the mixture of Flu and Rho 6G in buffer  
117 (C) or in serum (100%) (D).

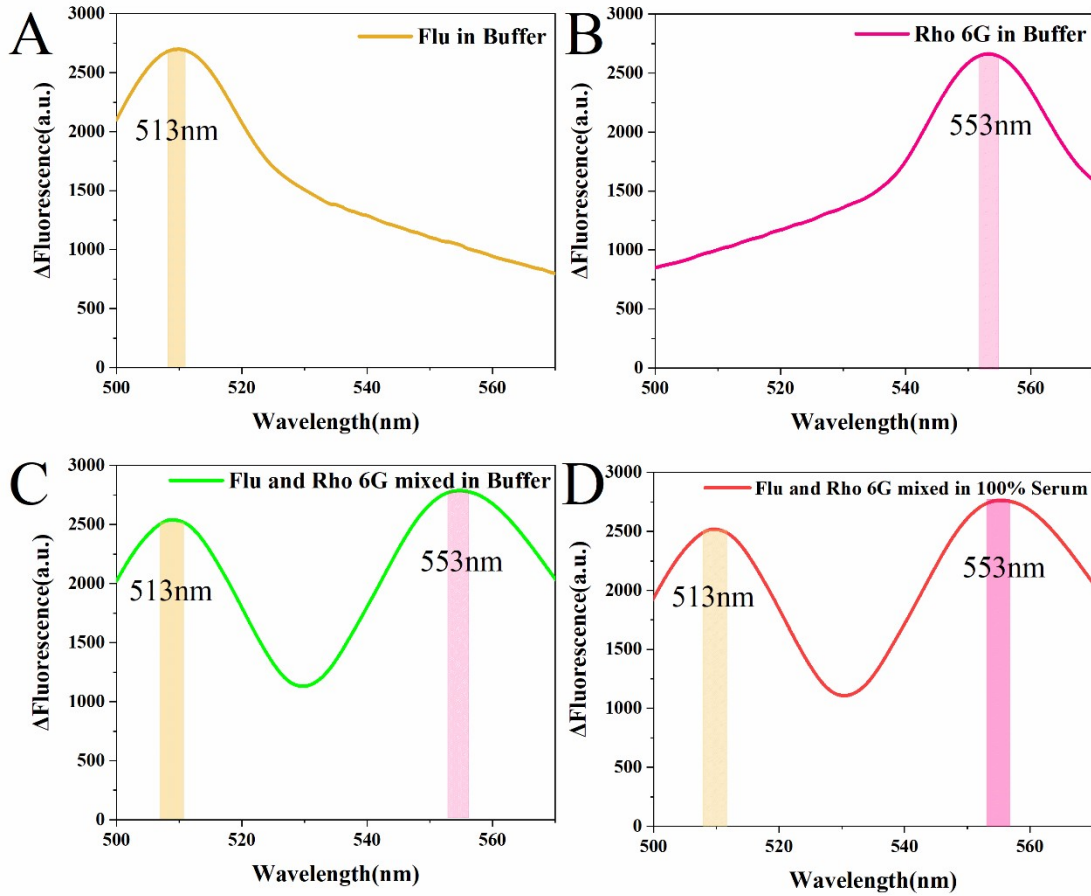

118

119

120 **Figure S3** The structural equilibrium probability maps of P1ss and P2ss (A), P1h and  
 121 P2h (B), P1ss with T1, P2ss with T2 (C), P1h with T1 and P2h with T2 (D).

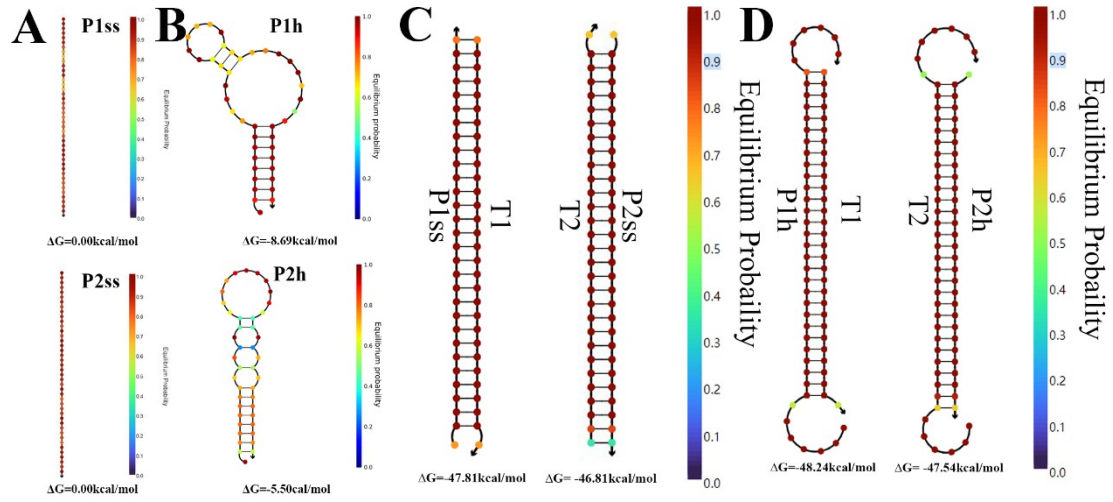

122

123

124 **Figure S4** Mechanism (A) and PAGE (B) of Exo I-catalyzed hydrolysis for the P1ss,  
125 P2ss, P1h and P2h.

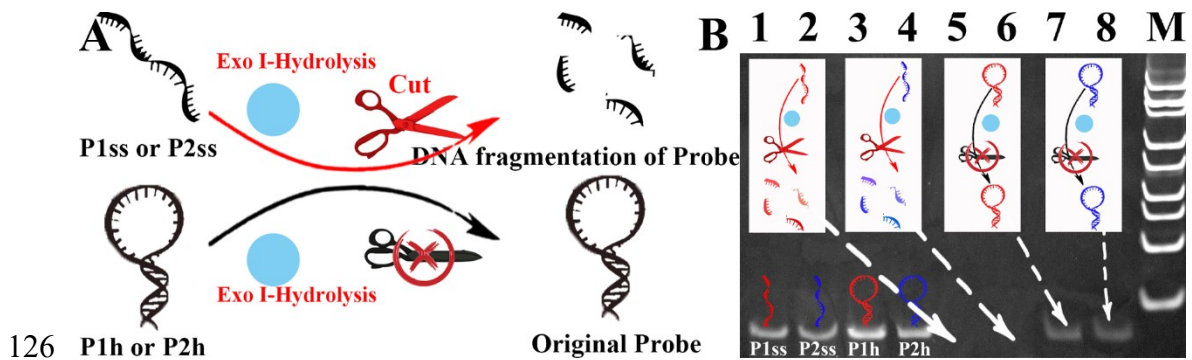

126 **Mechanism:** It has been demonstrated that Exonuclease I (Exo I), derived from *E. coli*,  
127 exhibits the ability to catalyze the hydrolysis of single-stranded DNA (ssDNA)  
128 specifically from its 3'-terminus, while not affecting double-stranded DNA (dsDNA).  
129 Therefore, if the hydrolysis of the single-stranded probe by Exo I is inhibited, it would  
130 serve as evidence to confirm the formation of hairpin structures by the probes shown in  
131 Figure S4A.  
132

133 **Experimental Procedure:** Firstly, 2.0  $\mu\text{L}$  of P1ss, P2ss, P1h, and P2h ( $10^{-5}$  M) were  
134 respectively mixed with 18  $\mu\text{L}$  of Exo I (1.25 U/ $\mu\text{L}$ ) at 37  $^{\circ}\text{C}$  for 0.5 hours.  
135 Subsequently, 10  $\mu\text{L}$  supernatant from each mixture was collected and thoroughly  
136 mixed with 2  $\mu\text{L}$  of buffer, one by one. These samples were then added to each lane  
137 and the power supply was activated. Finally, the gel was removed and stained with  
138 ethidium bromide (EB) solution (30  $\mu\text{L}$ , diluted with deionized water) in darkness for  
139 30 minutes. The gel was then imaged using a bioelectrophoretic image analysis system.

140 **Results and Discussion:** The Figure S4B show that clear bands can be observed in  
141 lanes 1, 2, 3, and 4, which correspond to P1ss, P2ss, P1h, and P2h, respectively. Lanes  
142 5 to 8 represent the results of Exo I-catalyzed hydrolysis (30 min, 37  $^{\circ}\text{C}$ ) of mixtures  
143 containing the same concentrations of P1ss, P2ss, P1h, and P2h. In lanes 7 and 8, the  
144 probe bands are still visible, indicating that the hairpin structure of the probes remains

145 intact. However, in lanes 5 and 6, the probe bands disappear, suggesting the cleavage  
146 of the probe strands by Exo I. Overall, these results confirm that P1h and P2h do indeed  
147 form the hairpin structure.

148 **Figure S5** Fluorescence response for P1ss, P2ss, P1h and P2h modified with FAM and  
149 BHQ1.

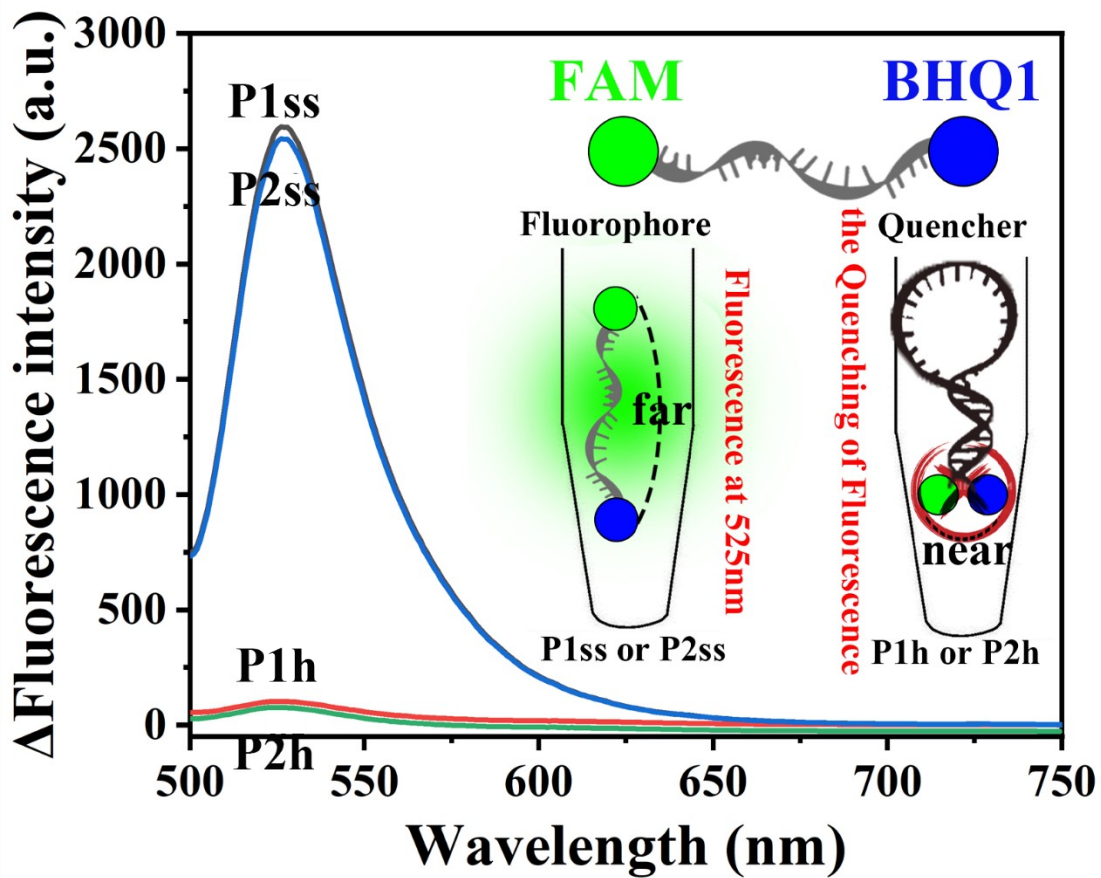

150

151 **Mechanism:** P1ss, P2ss, P1h and P2h were modified with FAM (the fluorescent dye)  
152 and BHQ1 (the quenching agent) markers at their ends. For P1ss and P2ss, they are the  
153 linear conformation, leading to a significant distance between FAM and BHQ1.  
154 Therefore, a strong fluorescence signal was observed. For P1h and P2h, they are the  
155 hairpin structure, so FAM and BHQ1 were forced to be close to each other. As a result,  
156 fluorescence quenching was observed.

157 **Experimental Procedure:** P1h and P2h were centrifuged at a speed of 4000 for 1  
158 minute, then diluted into buffer. Subsequently, they were heated at 95° C for 5 minutes,  
159 then cool to room temperature. Finally, the fluorescence signal was recorded. For P1ss  
160 and P2ss, the fluorescence signal was directly measured without the other treatments.



161 **Results and Discussion:** For P1ss and P2ss, due to their linear conformation where  
162 both FAM and BHQ1 are at ends, the strong fluorescence signals were observed.  
163 Interestingly, after annealing, the hairpin structure was formed for P1h and P2h. In this  
164 case, FAM and BHQ1 were forced to be close to each other. As a result, fluorescence  
165 quenching was observed in Figure S5.

166 **Figure S6** SEM image (A), TEM image (B), XRD (C), FTIR (D), and EDS (E) of NH<sub>2</sub>-  
167 MIL-53 (Al).

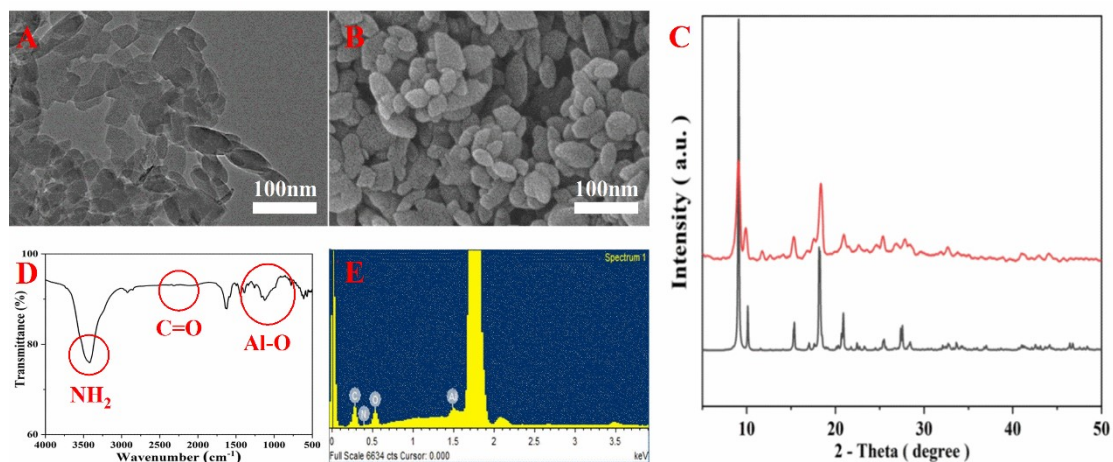

168

169 To confirm the successful synthesis of NH<sub>2</sub>-MIL-53 (Al), a series of  
170 characterizations were carried out. Firstly, the morphology of the composite was  
171 characterized by scanning electron microscope and transmission electron microscope.  
172 It can be seen from Figure S6A that the synthesized MOF material is rhombic with an  
173 average particle size of about 100 nm. This conclusion is consistent with that reported  
174 in the literature. In addition, the corresponding TEM (Figure S6B) further proves this  
175 view. To further confirm the successful preparation of MOF, X-ray diffraction (XRD),  
176 fourier transform infrared spectroscopy (FTIR), and energy dispersive spectroscopy  
177 (EDS) were performed. The black curve and the red curve represent the XRD patterns  
178 of simulated patterns of NH<sub>2</sub>-MIL-53 (Al) (CCDC901254) and NH<sub>2</sub>-MIL-53 (Al). It  
179 can be seen from Figure S6C that the peak values at 2θ of 9.2°, 18.2°, 25.4°, and 27.8°  
180 are consistent with the simulation results, this indicates that MOF was successfully  
181 synthesized.

182 As shown in Figure S6D, the absorption peaks at  $3417\text{ cm}^{-1}$  and  $3500\text{ cm}^{-1}$  are  
183 related to the symmetric and asymmetric stretching of amino groups. The absorption  
184 peak at  $1400\text{-}1600\text{ cm}^{-1}$  corresponds to the symmetric and asymmetric stretching of  
185 carbonyl groups. The Al-O vibration peak is at  $\sim 1100\text{ cm}^{-1}$ ,  $900\text{ cm}^{-1}$ , and  $610\text{ cm}^{-1}$ .  
186 Additionally, elements of C, N, O, and Al were displayed in Energy dispersive  
187 spectroscopy (EDS) (Figure S6E). All these indicate that  $\text{NH}_2\text{-MIL-53 (Al)}$  has been  
188 successfully synthesized.

189 **Figure S7** Fluorescence response of Flu, MOF@Flu, MOF@Flu@P1h, Flu@P1h,  
190 Flu@T1, Flu@P1h@T1, and MOF@Flu@P1h+T1.

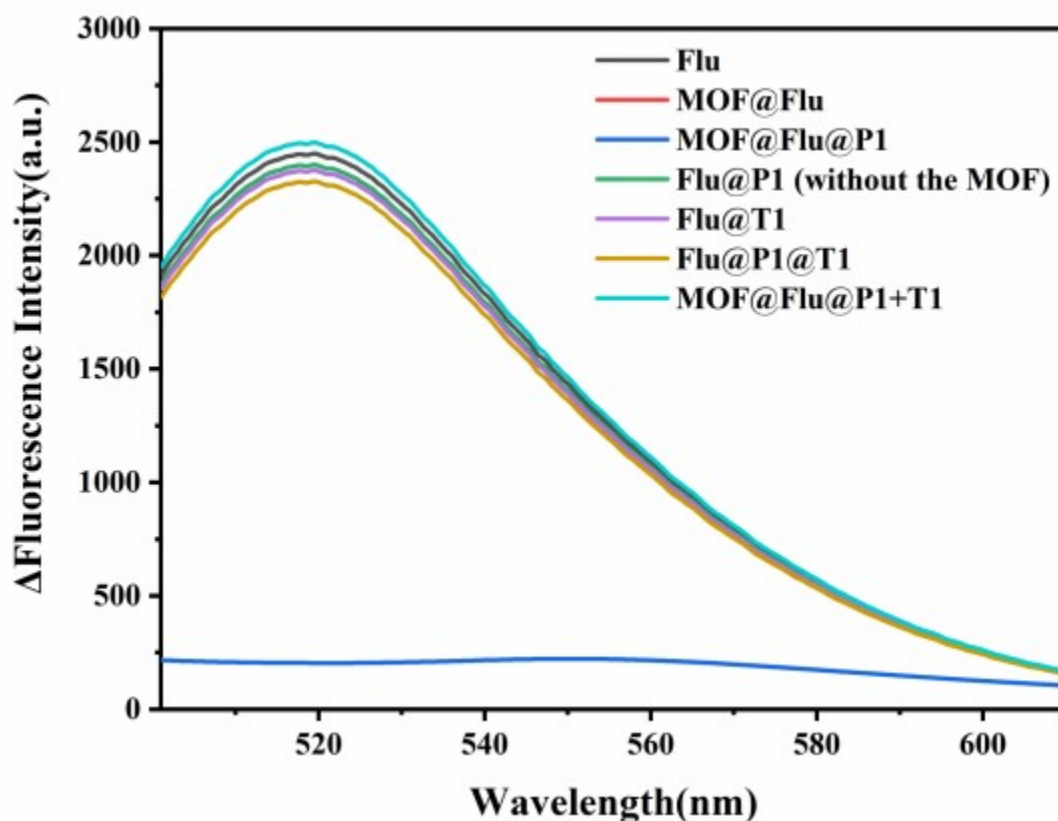

191

192 In order to assess the significance of MOFs, various samples including Flu,  
193 MOF@Flu, MOF@Flu@P1h, Flu@P1h, Flu@T1, Flu@P1h@T1, and  
194 MOF@Flu@P1h+T1 were utilized. Figure S7 illustrates the results. In the absence of  
195 MOF, the response of Flu remains unchanged and at a high level before and after the  
196 addition of the target. Conversely, the presence of MOF and P1h leads to a significant  
197 difference in the response of Flu before and after the target is added. The principal  
198 function of MOF is its notable loading capability, selective adsorption of guest  
199 molecules, and impeding interference from heteromolecules in the environment. On the  
200 other hand, the primary function of the probes is their impressive gatekeeping  
201 behavior.

202 **Figure S8** Schematic diagram of the preparation process of MOF@Flu@P1h and  
203 MOF@Rho 6G@P2h.

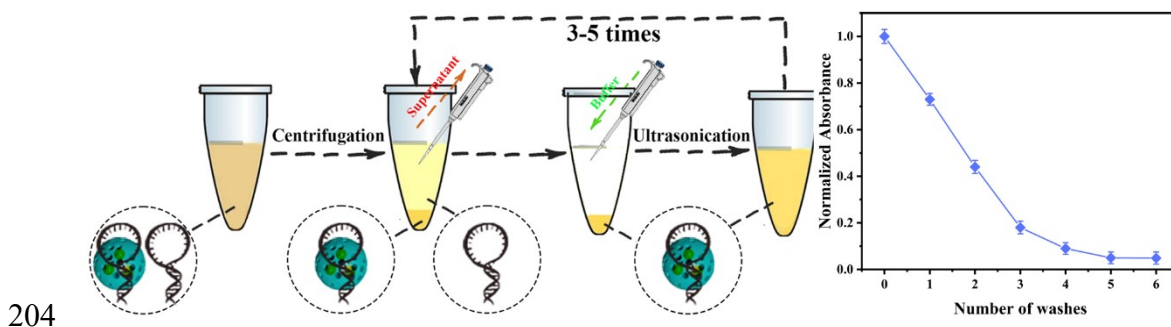

205 These probes, specifically DNA, initially form an ionic bond with the amino  
206 cations of the MOF through its phosphate anions, allowing the probe to be adsorbed  
207 onto the MOF surface. During the preparation of MOF@Flu@P1h and MOF@Rho  
208 6G@P2h, water washing treatment and centrifugation were utilized multiple times.  
209 Every time, the supernatants were collected, then analyzed through UV. As shown in  
210 Figure S8, the UV absorption peak of DNA gradually decreases until reaching its lowest  
211 point. This indicated that any loosely-bonded probes from the MOF@Flu@P1h and  
212 MOF@Rho 6G@P2h and the free-style probe have been removed. Under this  
213 condition, the centrifuged product demonstrate the UV absorbance peaks at 260 and  
214 360, indicating the successful preparation of MOF@Flu@P1h and MOF@Rho  
215 6G@P2h (Figure 2A c, d).

216 **Figure S9** The stability of the probe DNA on the MOF carrier. “Vibration,  
217 Centrifugation, and Ultrasonication”: Fluorescent signal of Flu and Rho 6G for the  
218 supernatant collected from MOF@Flu@P1h and MOF@Rho 6G@P2h treated through  
219 the various operation, including vibration, centrifugation, and ultrasonication. Control  
220 sample: Fluorescent signal of Flu and Rho 6G for the supernatant after the introduction  
221 of T1 and T2 into MOF@Flu@P1h and MOF@Rho 6G@P2h (this fluorescent signal  
222 was set as 1). The error bars represent the standard deviation of the three samples.  
223

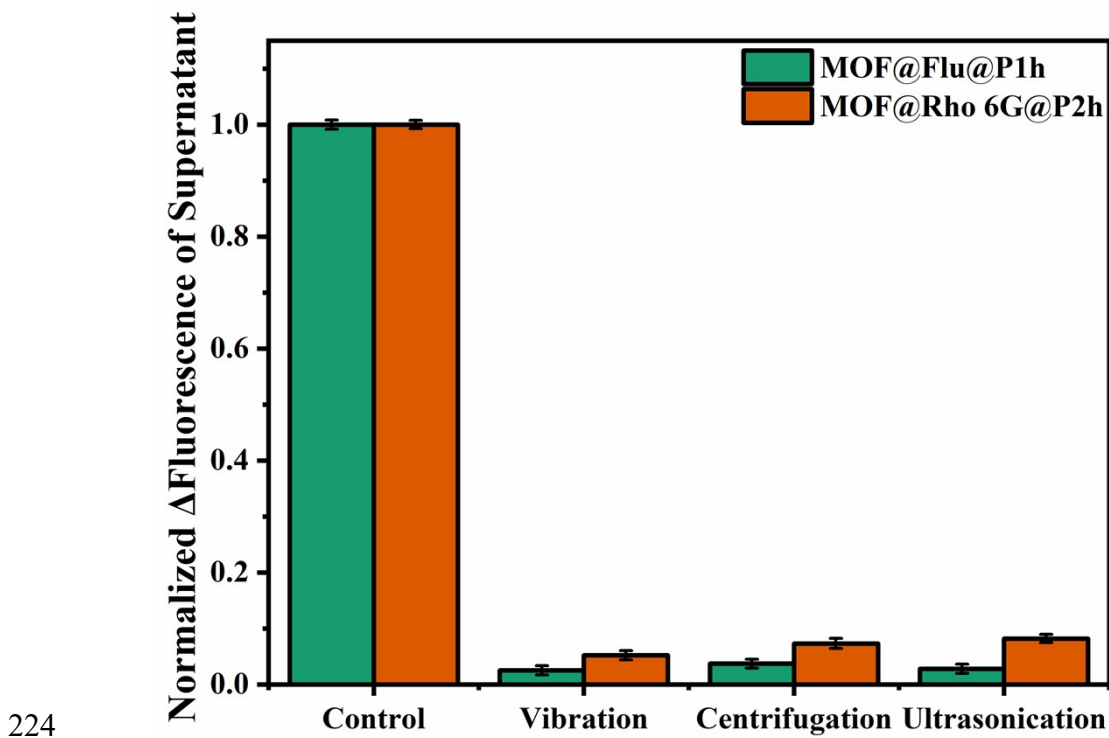

224  
225 **Stability:** Next, the stability of probe DNA on the MOF carrier was investigated. Here,  
226 MOF@Flu@P1h and MOF@Rho 6G@P2h were soaked, shocked, centrifuged and  
227 sonicated for up to 30 min. Then the Flu and Rho 6G was detected through the  
228 collection of supernatants after the various operation. As shown Figure S9. no obvious  
229 trace of Flu and Rho 6G was found (The sample treated through vibration,  
230 centrifugation, and ultrasonication). Interestingly, the introduction of T1 and T2 can  
231 immediately trigger the door of MOF@Flu@P1h and MOF@Rho 6G@P2h (Control

232 sample). A larger number of Flu and Rho 6G rushed out from the cavity of MOF (Its  
233 fluorescent signal was set as 1). This indicates that the stability of probe DNA on the  
234 MOF carrier was excellent.

235 **Figure S10** Competitive processes of MOF@Flu@P1h and MOF@Rho 6G@P2h,  
236 respectively, in the presence of the target

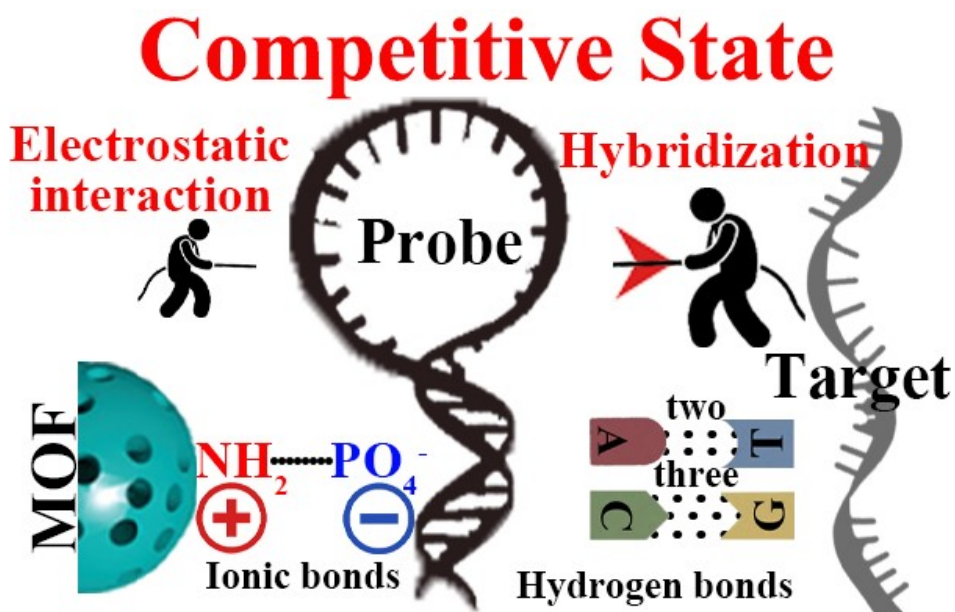

237

238 **Mechanism:** In the hybridization-induced platform, the probe DNA forms an ionic  
239 bond with the amino cations of MOF through its phosphate anions, facilitating the  
240 probe's adsorption onto the MOF surface. When the target substance is introduced, the  
241 hybridization between the target and the probe weakens the interactions between the  
242 probe and the MOF, resulting in the dissociation of the probe from the MOF. As a  
243 result, the fluorescent molecule is released, fulfilling the purpose of detection (Figure  
244 S10).



245 **Figure S11** Effect of pH on the modification of MOF@Flu and MOF@Rho 6G with  
246 P1h (A) or P2h (B). Effect of pH on the hybridization between MOF@Flu@P1h and  
247 MOF@Rho 6G@P2h with T1 (C) or T2 (D). Error bars were derived from three parallel  
248 experiments.

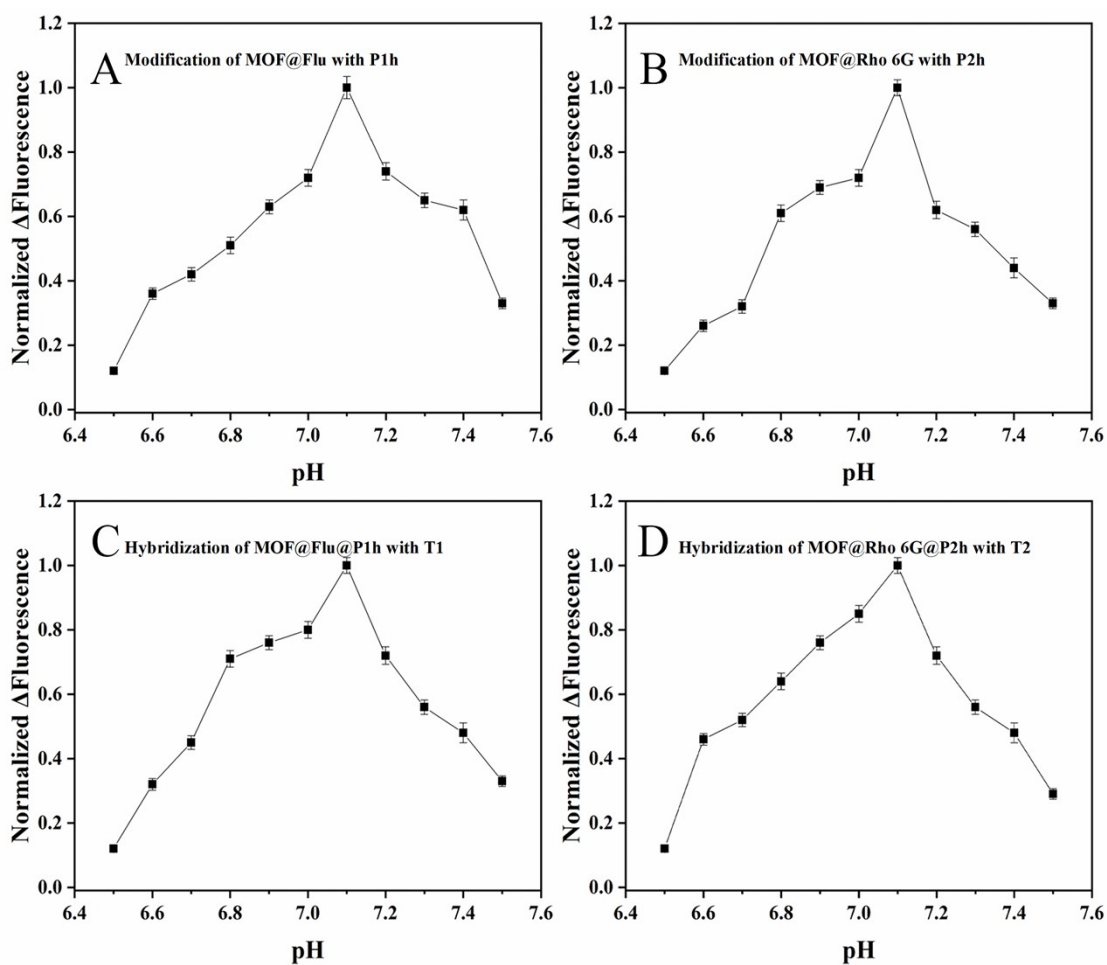

249  
250 **pH optimization of modification:** In this experimental setup, the MOF@Flu is  
251 prepared by adding 1 mL of MOF (1 mg/mL) into 1 mL of a Flu (10 mg/mL) prepared  
252 with sodium acetate buffer (NaAc-Hac) at pH levels ranging from 6.5 to 7.5. After  
253 incubating the mixture for 12 hours at 37 °C, P1h (10 μL, 10<sup>-5</sup> M) is combined with the  
254 MOF@Flu and allowed to incubate for an additional 12 hours. This results in the  
255 formation of MOF@Flu@P1h, which is then washed with deionized water to remove  
256 any unbound P1h molecules. In a similar manner, the MOF@Rho 6G@P2h complex is

257 prepared by substituting Flu and P1h with Rho 6G and P2h. The MOF@Flu@P1h  
258 complex and MOF@Rho 6G@P2h complex were mixed in a 1:1 ratio with deionized  
259 water. T1T2 ( 10  $\mu$ L,  $10^{-5}$  M ) were added to the MOF@Flu@P1h and MOF@Rho  
260 6G@P2h (1:1, 2 mL, 1 mg/mL) solutions and incubated for 30 minutes. After  
261 centrifugation, the supernatant was collected and the relative change in fluorescence  
262 intensity ( $\Delta$ fluorescence intensity) was recorded.

263 **pH optimization of hybridization:** In this experimental setup, the MOF@Flu is  
264 prepared by adding 1 mL of MOF (1 mg/mL) into 1 mL of a Flu (10 mg/mL) prepared  
265 with sodium acetate buffer (NaAc-Hac) at pH 7.1. After incubating the mixture for 12  
266 hours at 37  $^{\circ}$ C, P1h (10  $\mu$ L,  $10^{-5}$  M) is combined with the MOF@Flu and allowed to  
267 incubate for an additional 12 hours. This results in the formation of MOF@Flu@P1h,  
268 which is then washed with deionized water to remove any unbound P1h molecules. To  
269 study the interaction between the complexes and the compound T1T2 (10  $\mu$ L,  $10^{-5}$ M)  
270 are separately added to the MOF@Flu@P1h and MOF@Rho 6G@P2h complexes. The  
271 mixture of MOF@Flu@P1h and MOF@Rho 6G@P2h (in a 1:1 ratio) is dissolved in a  
272 2 mL buffer solution (1 mg/mL) and then incubated with the same concentrations (10  
273  $\mu$ L,  $10^{-5}$ M) of T1T2 for 30 minutes at pH levels ranging from 6.5 to 7.5. Following  
274 incubation, the mixture is subjected to centrifugation, and the supernatant is collected.  
275 The relative change in fluorescence intensity ( $\Delta$ fluorescence intensity) is recorded as a  
276 measure of the interaction between the complexes and T1T2.

277 Here, the optimal pH values for the modification of MOF@Flu or MOF@Rho 6G  
278 with P1h (A) or P2h (B), and the hybridization between MOF@Flu@P1h and  
279 MOF@Rho 6G@P2h with T1 (C) or T2 (D), were investigated. We found that the  
280 highest fluorescence signals were observed at pH=7.1 (Figure S11).

281 **Figure S12** Effect of temperatures on the modification of MOF@Flu and MOF@Rho  
282 6G with P1h (A) or P2h (B). Effect of temperatures on the hybridization between  
283 MOF@Flu@P1h and MOF@Rho 6G@P2h with T1 (C) or T2 (D). Error bars were  
284 derived from three parallel experiments. The error bars represent the standard deviation  
285 of the three samples.

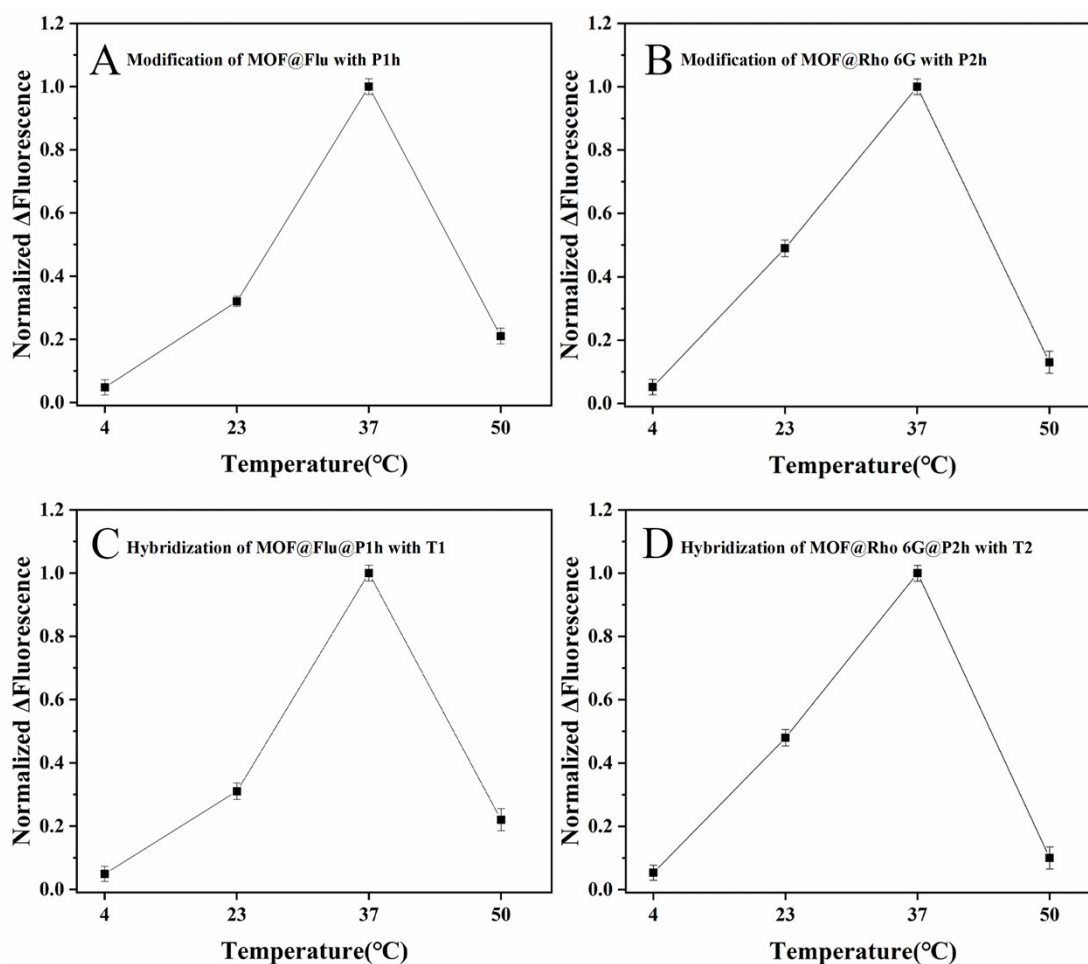

286  
287 **Modification temperature optimization:** MOF (1 mL, 1 mg/mL) was added to the  
288 Flu (1 mL, 10 mg/mL) prepared with optimized pH and incubated for 12 hours of  
289 different reaction temperatures (4  $^{\circ}$ C, 25  $^{\circ}$ C, 37  $^{\circ}$ C, 55  $^{\circ}$ C). Subsequently, the hairpin  
290 structure P1h (10  $\mu$ L,  $10^{-5}$  M) was mixed with the MOF@Flu, and each sample was  
291 reacted for 12 hours. The loosely bound P1h (MOF@Flu@P1h) was then removed  
292 using deionized water. The same procedure was repeated to prepare the MOF@Rho

293 6G@P2h complex, with Rho 6G and P2h replacing Flu and P1h (MOF@Rho  
294 6G@P2h). The MOF@Flu@P1h complex and MOF@Rho 6G@P2h complex were  
295 mixed in a 1:1 ratio with deionized water. T1T2 ( 10  $\mu$ L,  $10^{-5}$  M ) were added to the  
296 MOF@Flu@P1h and MOF@Rho 6G@P2h (1:1, 2 mL, 1 mg/mL) solutions and  
297 incubated for 30 minutes. After centrifugation, the supernatant was collected and the  
298 relative change in fluorescence intensity ( $\Delta$ fluorescence intensity) was recorded.

299 **Hybridization temperature optimization:** In this experimental setup, the MOF@Flu  
300 is prepared by adding 1 mL of MOF (1 mg/mL) into 1 mL of a Flu (10 mg/mL) prepared  
301 with sodium acetate buffer (NaAc-Hac) at pH 7.1. After incubating the mixture for 12  
302 hours at 37  $^{\circ}$ C, P1h (10  $\mu$ L,  $10^{-5}$  M) is combined with the MOF@Flu and allowed to  
303 incubate for an additional 12 hours. This results in the formation of MOF@Flu@P1h,  
304 which is then washed with deionized water to remove any unbound P1h molecules. The  
305 MOF@Flu@P1h complex and MOF@Rho 6G@P2h complex were mixed in a 1:1 ratio  
306 with deionized water. T1T2 ( 10  $\mu$ L,  $10^{-5}$  M ) were added to the MOF@Flu@P1h and  
307 MOF@Rho 6G@P2h (1:1, 2 mL, 1 mg/mL) solutions and incubated for 30 minutes.  
308 After centrifugation, the supernatant was collected and the relative change in  
309 fluorescence intensity ( $\Delta$ fluorescence intensity) was recorded. An experiment was  
310 carried out to investigate the effect of different reaction temperatures (4  $^{\circ}$ C, 25  $^{\circ}$ C, 37  
311  $^{\circ}$ C, 55  $^{\circ}$ C) on the fluorescence signal, while keeping other conditions constant.

312 4  $^{\circ}$ C, 23  $^{\circ}$ C, 37  $^{\circ}$ C, and 50  $^{\circ}$ C were utilized to optimize the temperature  
313 conditions for the modification of MOF@Flu and MOF@Rho 6G using P1h (A) or P2h  
314 (B) and the subsequent hybridization between MOF@Flu@P1h and MOF@Rho  
315 6G@P2h with T1 (C) or T2 (D). As depicted in Figure S12A and Figure S12B, it was  
316 observed that 37  $^{\circ}$ C represents the optimal temperature for both the modification of

317 MOF@Flu and MOF@Rho 6G with P1h (A) or P2h (B) and the hybridization between

318 MOF@Flu@P1h and MOF@Rho 6G@P2h with T1 (C) or T2 (D).

319 **Figure S13** Effect of time on the modification of MOF@Flu and MOF@Rho 6G with  
320 P1h (A) or P2h (B). Error bars were derived from three parallel experiments. The error  
321 bars represent the standard deviation of the three samples.

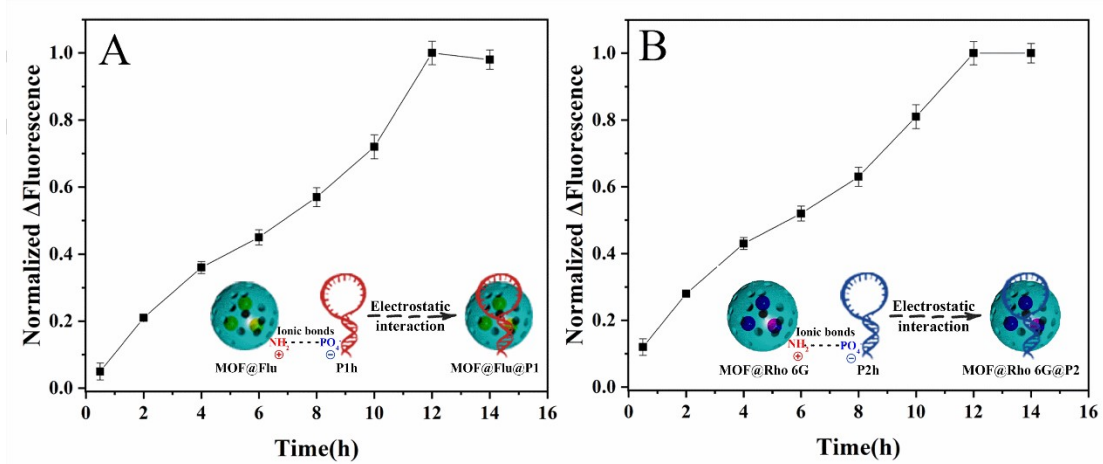

322  
323 **Optimization of modification time:** The MOF solution (1 mL, 1 mg/mL) was added  
324 to the Flu solution (1 mL, 10 mg/mL) at the optimized pH and incubated for 12 hours.  
325 Then, the hairpin structure P1h (10  $\mu$ L, 10<sup>-5</sup> M) was mixed with the MOF@Flu  
326 solution, and each sample was allowed to react for various time points including 0 h, 2  
327 h, 4 h, 6 h, 8 h, 10 h, 12 h, 14 h, and 16 h. Finally, the loosely bound P1h  
328 (MOF@Flu@P1h) complex was removed using deionized water. The same procedure  
329 was repeated for the preparation of MOF@Rho 6G@P2h, except that Rho 6G and P2h  
330 were used instead of Flu and P1h (MOF@Rho 6G@P2h). The MOF@Flu@P1h  
331 complex and the MOF@Rho 6G@P2h complex were mixed in a 1:1 ratio with  
332 deionized water. T1T2 (10  $\mu$ L, 10<sup>-5</sup> M) were added to the MOF@Flu@P1h and  
333 MOF@Rho 6G@P2h (1:1, 2 mL, 1 mg/mL) solutions and incubated for 30 minutes.  
334 After centrifugation, the supernatant was collected, and the relative change in  
335 fluorescence intensity ( $\Delta$ fluorescence intensity) was recorded.

336 Firstly, several MOF@Flu@P1h and MOF@Rho 6G@P2h were prepared through  
337 incubation between MOF@Flu or MOF@Rho 6G and P1h or P2h at different time (0

338 h, 2 h, 4 h, 6 h, 8 h, 10 h, 12 h, 14 h, and 16 h). The fluorescence signal strength of the  
339 supernatant was then detected after the respective addition of T1 or T2 to the several  
340 MOF@Flu@P1h or MOF@Rho 6G@P2h. As shown in Figure S13, the optimal  
341 incubation time was determined to be 12 h.

342 **Figure S14** Fluorescence response of MOF@Flu@P1h and MOF@Rho 6G@P2h to  
343 the addition of T1T2 in several possible coexisting interfering substances, including  
344 metal ions ( $K^+$ ,  $Na^+$ ), proteins (BSA, BP26 DA) (A) and complex biological systems  
345 (1%,5%,10%,20% and 30% serum) (B). The error bars represent the standard deviation  
346 of the three samples.

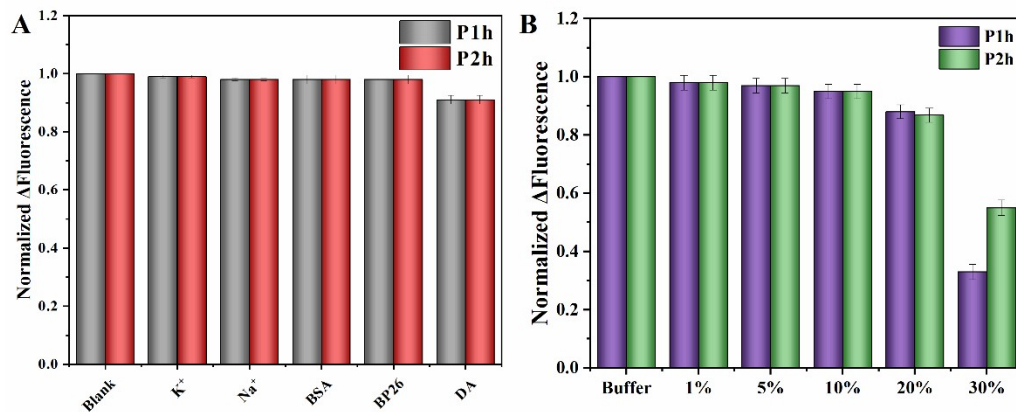

347  
348 As depicted in the Figure S14, MOF@Flu@P1h and MOF@Rho 6G@P2h  
349 demonstrated negligible interference from various substances, including up to 20%  
350 serum, signifying their robustness and reliability in detecting target DNA sequences in  
351 real samples.



352 **Figure S15** Assessment of detection capability from numerous tests for  
353 MOF@Flu@P1h (A) and MOF@Rho 6G@P2h (B). The x axis was an arbitrary  
354 laboratory number and was omitted for clarity.

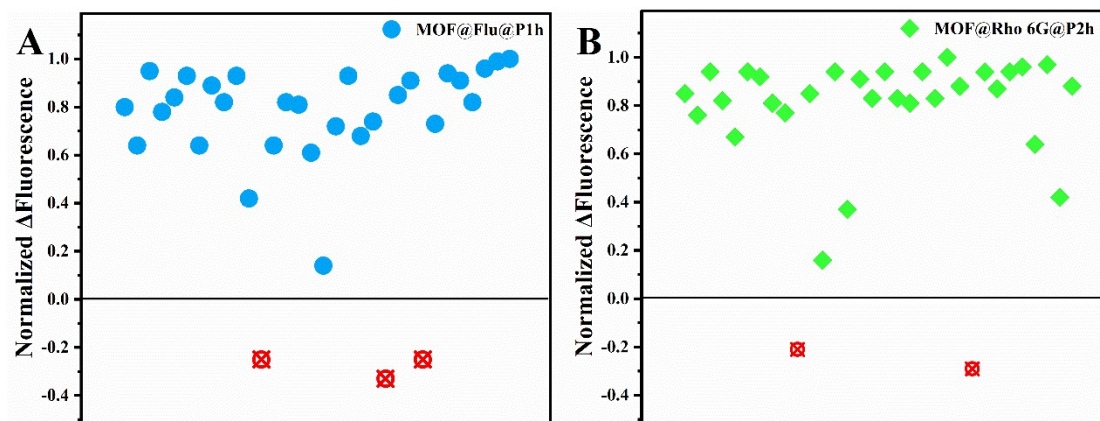

355

356

357 **Figure S16** Comparison of prices with commercial products.

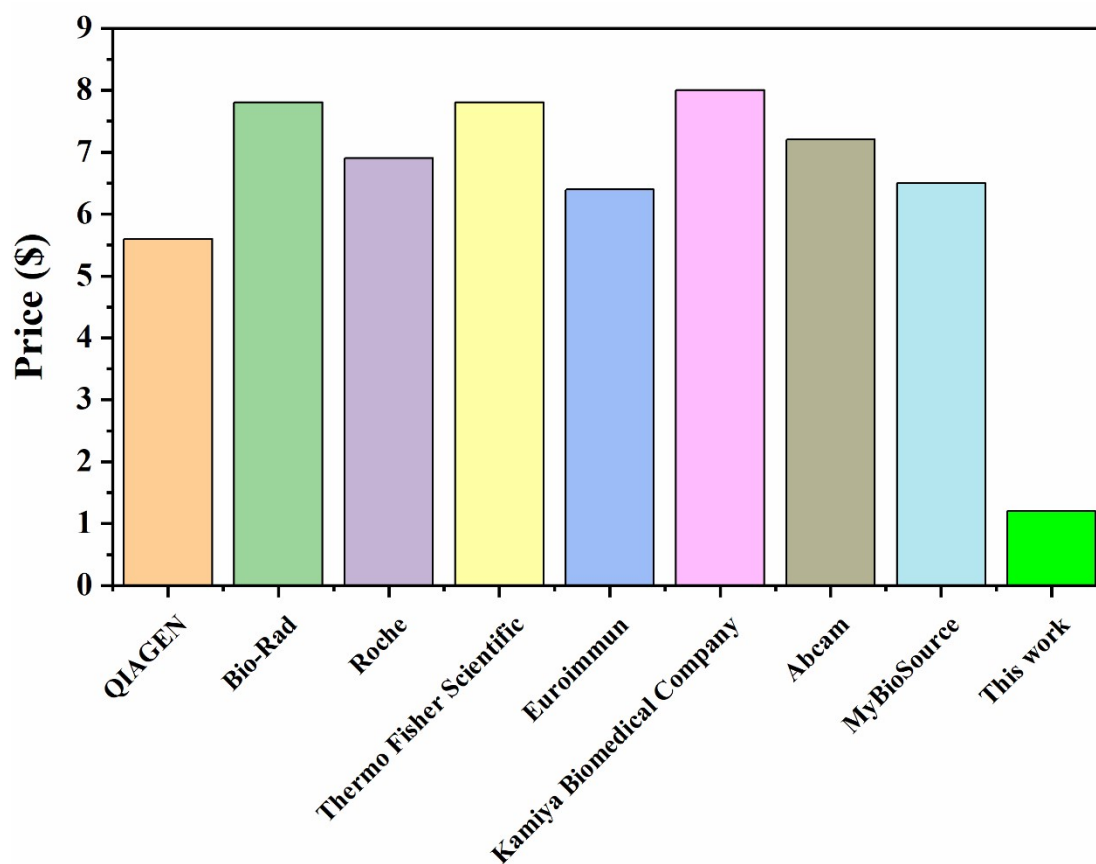

358

359 Currently, in Figure S16 commercially available products such as QIAGEN, Bio-  
360 Rad, Roche, Thermo Fisher Scientific PCR kits, and Euroimmun, Kamiya Biomedical  
361 Company, Abcam, MyBioSource ELISA kits are priced at around \$8 in Figure S16.  
362 Our strategy primarily relies on MOFs, dyes, probes, and testing costs. According to  
363 their market price, for each detection, approximately \$0.27 should be paid for probes,  
364 \$0.77 for MOF, \$0.019 for Flu and \$0.027 for Rho 6G. So, \$1 was determined in our  
365 strategy. Additionally, the raw materials for MOF@Flu@P1h and MOF@Rho  
366 6G@P2h can be regenerated, and even after five cycles of recycling, the detection  
367 efficiency remains as high as 90%. This provides significant benefits in terms of

368 reducing the price of our strategy. Although this differs from the calculation of  
369 commercial product prices, a low cost can be still considered.

370 **Figure S17** The impact of different storage conditions (pH, buffer and temperature) on  
 371 the performance of MOF@Flu@P1h and MOF@Rho 6G@P2h. (A) After being stored  
 372 at different pH for 3 days, the detection performance of MOF@Flu@P1h and  
 373 MOF@Rho 6G@P2h after adding T1T2 (a), T1WB2 (b) and WB1WB2 (c). (B)  
 374 Storage time of MOF@Flu@P1h (a) and MOF@Rho 6G@P2h (b) at different  
 375 temperatures. (C) After being stored at different buffer for 3 days, the detection  
 376 performance of MOF@Flu@P1h and MOF@Rho 6G@P2h after adding T1T2 (a),  
 377 T1WB2 (b) and WB1WB2 (c). The error bars represent the standard deviation of the  
 378 three samples.

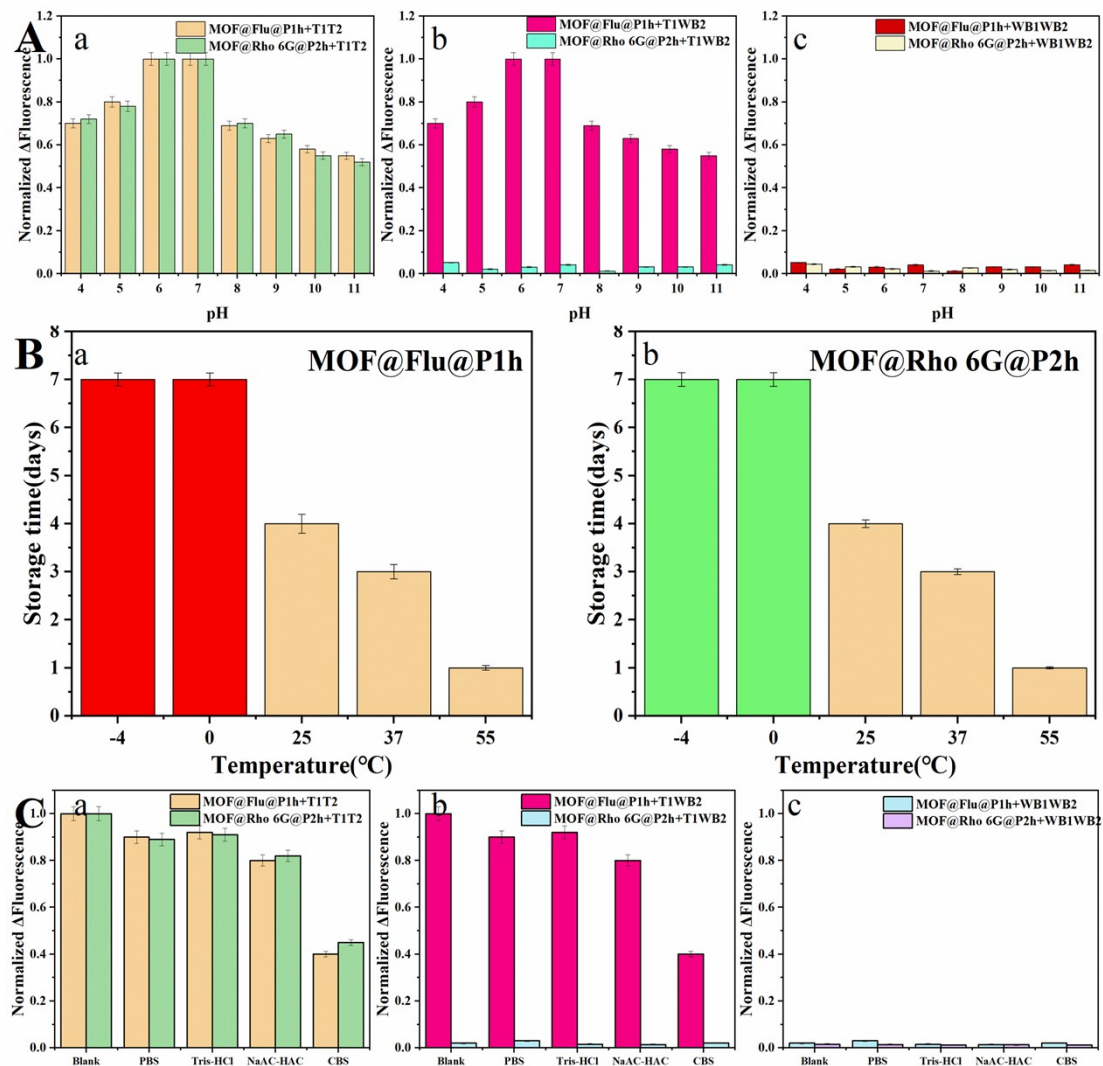

380 The fluorescence signal of MOF@Flu@P1h and MOF@Rho 6G@P2h remained  
381 relatively stable for the optimal duration within the pH range of 6 to 7 after 3 days  
382 (Figure S17A) between -4 °C to 0 °C (Figure S17B) in the different buffering solutions  
383 (Figure S17C).

384 **Figure S18** Fluorescence response of MOF@Flu@P1h and MOF@Rho 6G@P2h  
 385 under the addition of T1T2 (A), T1WB2 (B), and WB1WB2 (C) at different time  
 386 intervals (Blank, 1 day, 2 days, 3 days, 4 days, 7 days). Error bars were derived from three  
 387 parallel experiments. The error bars represent the standard deviation of the three  
 388 samples.

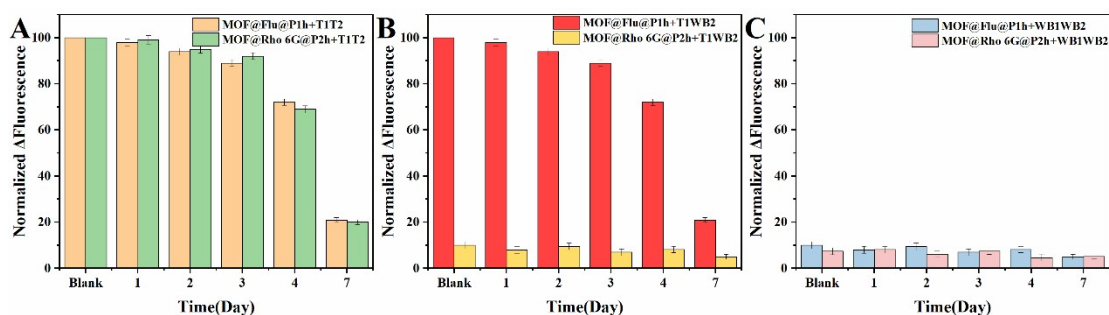

389

390 We investigated the stability of MOF@Flu@P1h and MOF@Rho 6G@P2h by  
 391 testing their detection performance at different time intervals. As depicted in Figure  
 392 S18, the probe's detection efficiency reduced gradually as the duration of storage  
 393 increased. After a 2 days interval, the fluorescence signal exhibited only a 5% change,  
 394 which increased to 10% after 3 days, 30% after 4 days, and nearly 80% after 7 days.  
 395 These results highlight that the optimal time to utilize MOF@Flu@P1h and MOF@Rho  
 396 6G@P2h is within 7 days after their preparation.

397 **Figure S19** Fluorescence response of the regenerated MOF@Flu@P1h and  
398 MOF@Rho 6G@P2h under the addition of T1T2 at different cycle times (1, 2, 3, 4, 5,  
399 6). Error bars were derived from three parallel experiments. The error bars represent  
400 the standard deviation of the three samples.

401

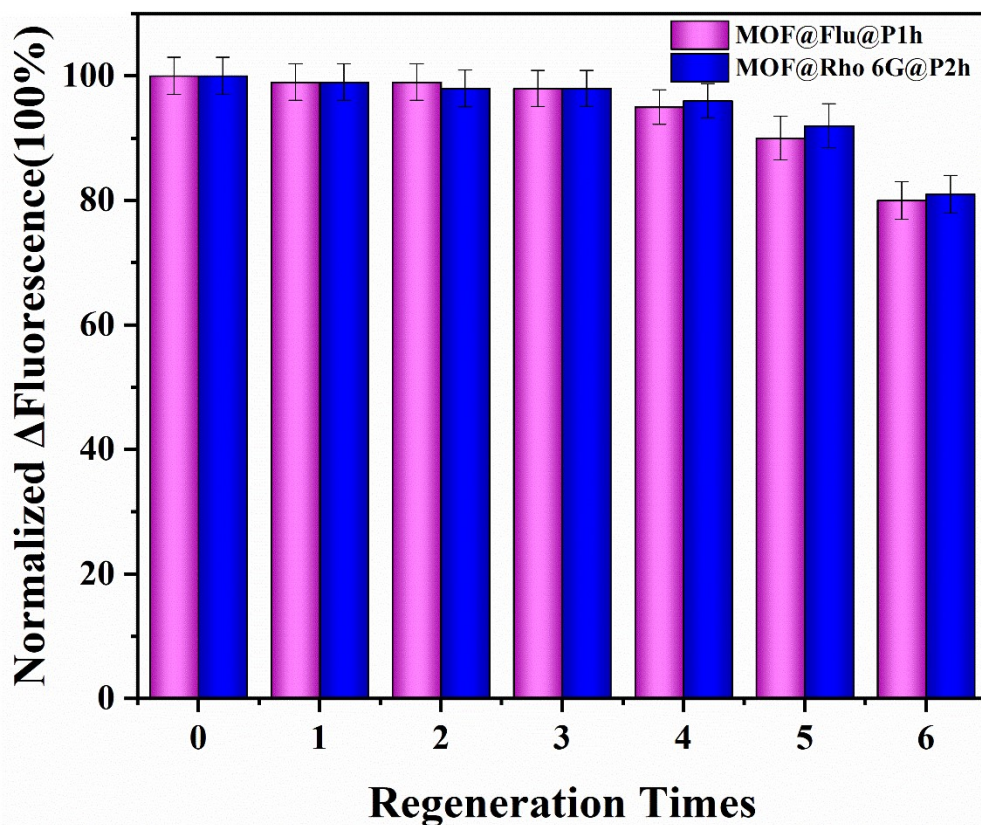

402

403 In this procedure, we aim to regenerate MOF@Flu@P1h and MOF@Rho  
404 6G@P2h, which has been used, through a high concentration of urea (10M).  
405 Subsequently, we will perform new sensing modifications and detection processes.  
406 Based on our experimental findings, the sensitivity of the sensing decreases  
407 significantly after replenishing five times (Figure S19).

## 408 References

- 409 1. X. Cheng, A. Zhang, K. Hou, M. Liu, Y. Wang, C. Song, G. Zhang, Size-and  
410 morphology-controlled NH<sub>2</sub>-MIL-53 (Al) prepared in DMF–water mixed  
411 solvents , *Dalton Transactions*, 2013, **42**, 13698-13705.  
412 <https://doi.org/10.1039/C3DT51322J>
- 413 2. A. Cavaglià, N. Gromov, J. Julius, Bootstrability in defect CFT: integrated  
414 correlators and sharper bounds, *Journal of High Energy Physics*, 2022, **2022**, 1-  
415 59. [https://doi.org/10.1007/JHEP05\(2022\)164](https://doi.org/10.1007/JHEP05(2022)164)
- 416 3. D. Averaimo, F. De Massis, G. Savini, G. Garofolo, F. Sacchini, A. Abass, M.  
417 Tittarelli, G. Migliorati, Detection of Brucella abortus Vaccine Strains RB51 in  
418 Water Buffalo (Bubalus bubalis) Milk, *Pathogens*, 2022, **11**, 748.  
419 <https://doi.org/10.3390/pathogens11070748>
- 420 4. A. Das, B. Kumar, S. Chakravarti, K. P. Singh, Single-tube duplex-PCR for  
421 specific detection and differentiation of Brucella abortus S19 vaccine strains from  
422 other Brucella spp, *Indian Journal of Animal Research*, 2019, **53**, 821-826.  
423 <https://doi.org/10.18805/ijar>.
- 424 5. B-3584 Bányász B, Antal J, Dénes B, False Positives in Brucellosis Serology:  
425 Wrong Bait and Wrong Pond, *Tropical Medicine and Infectious Disease*, 2023, **8**,  
426 274. <https://doi.org/10.3390/tropicalmed8050274>
- 427 6. Y. Lin, C. Cao, W. Shi, C. Huang, S. Zeng, J. Sun, J. Wu, Development of a triplex  
428 real-time PCR assay for detection and differentiation of gene-deleted and wild-  
429 type African swine fever virus, *Journal of Virological Methods*, 2020, **280**,



430 113875. <https://doi.org/10.1016/j.jviromet.2020.113875>

431 7. A. Bulashev, O. Akibekov, Z. Suranshiyev, B. Ingirbay, A. Sciences,  
432 Serodiagnostic potential of Brucella outer membrane and periplasmic proteins ·  
433 *Turkish Journal of Veterinary & Animal Sciences*, 2019, **43**, 486-493.  
434 <https://doi.org/10.3906/vet-1902-75>

435 8. A. Khan, A. Sayour, F. Melzer, S. El-Soally, M. Elschner, W. Shell, A. Moawad,  
436 S. Mohamed, A. Hendam and U. Roesler, Seroprevalence and molecular  
437 identification of Brucella spp. in camels in Egypt, *Microorganisms*, 2020, **8**, 1035.  
438 <https://doi.org/10.3390/microorganisms8071035>

439 9. M. Tabasi, S. Eybpoosh, S. Bouzari, Development of an indirect ELISA based on  
440 whole cell Brucella abortus S99 lysates for detection of IgM anti-Brucella  
441 antibodies in human serum, *Comparative immunology, microbiology and*  
442 *infectious diseases*, 2019, **63**, 87-93. <https://doi.org/10.1016/j.cimid.2019.01.007>

443 10. R. Hans, P. K. Yadav, P. K. Sharma, M. Boopathi and D. Thavaselvam,  
444 Development and validation of immunoassay for whole cell detection of Brucella  
445 abortus and Brucella melitensis *Scientific reports*, 2020, **10**, 8543.  
446 <https://doi.org/10.1038/s41598-020-65347-9>

447 11. L. Che, C. Qi, W. Bao, X. Ji, J. Liu, N. Du, L. Gao, K. Zhang and Y. Li, Monitoring  
448 the course of Brucella infection with qPCR-based detection *International Journal*  
449 *of Infectious Diseases*, 2019, **89**, 66-71. <https://doi.org/10.1016/j.ijid.2019.09.013>
